# Supplementary material for: Heritability and genetic correlations of obesity indices with ambulatory and office beat-to-beat blood pressure in the Oman Family Study
Source: PubMed Central journal article supplement — J Hypertens. Author manuscript; Available in PMC 2020 Aug 1. (PMC7374053; doi:10.1097/hjh.0000000000002430), 2020-08
Supplement: NIHMS1583725-supplement-supplement.pdf [file NIHMS1583725-supplement-supplement.pdf]

Online Supplementary

***Supplementary Table 1 Relative pairs in the five pedigrees in the Oman Family Study.***

| <b>Relationship</b>                     | <b>N</b>     |
|-----------------------------------------|--------------|
| Parent-offspring                        | 2482         |
| Siblings                                | 1278         |
| Grandparent-grandchild                  | 3774         |
| Avuncular                               | 2815         |
| Half-siblings                           | 322          |
| Grand avuncular                         | 2928         |
| Half avuncular                          | 918          |
| 1 <sup>st</sup> Cousins                 | 2610         |
| 1 <sup>st</sup> Cousins, 1 removed      | 932          |
| Half 1 <sup>st</sup> cousins, 1 removed | 441          |
| 2 <sup>nd</sup> cousins                 | 4363         |
| Other relationships                     | 390          |
| <b>Total</b>                            | <b>23253</b> |

**Supplementary table 2 Correlations of leptin with obesity indices and BP measurements**

|        | WHtR   | BMI    | %BF    | WC     | Ambulatory Daytime SBP | Ambulatory Daytime DBP | Ambulatory Sleep SBP | Ambulatory Sleep DBP | Ambulatory 24-h SBP | Ambulatory 24-h DBP | Office beat-to-beat SBP | Office beat-to-beat DBP |
|--------|--------|--------|--------|--------|------------------------|------------------------|----------------------|----------------------|---------------------|---------------------|-------------------------|-------------------------|
| WHtR   |        |        |        |        | .153**                 | .245**                 | .308**               | .355**               | .202**              | .297**              | .189**                  | .217**                  |
| BMI    | .770** |        |        |        | .180**                 | .269**                 | .319**               | .347**               | .229**              | .315**              | .300**                  | .272**                  |
| %BF    | .706** | .751** |        |        | .025                   | .177**                 | .188**               | .283**               | .063*               | .212**              | .098**                  | .128**                  |
| WC     | .955** | .785** | .629** |        | .208**                 | .269**                 | .339**               | .371**               | .259**              | .327**              | .280**                  | .299**                  |
| Leptin | .569** | .621** | .764** | .472** | -.035                  | .111**                 | .090**               | .144**               | -.005               | .125**              | .017                    | -.016                   |

\*\* . Correlation is significant at the 0.01 level (2-tailed). \* . Correlation is significant at the 0.05 level (2-tailed). WHtR: waist-to-height ratio; BMI: body mass index; %BF: percentage of body fat; WC: waist circumference

All variables were log-transformed if not normally distributed.
